# Supplementary material for: Upcycling of plastic waste to atomic nickel site-decorated carbon for efficient electrochemical CO2 conversion
Source: Royal Society of Chemistry journal article supplement (doi:10.1039/d4se00244j), 2024-01-01
Supplement: d4se00244j1.pdf [file d4se00244j1.pdf]

Electronic Supplementary Information

**Upcycling of plastic waste to atomic nickel sites decorated carbon for  
efficient electrochemical CO<sub>2</sub> conversion**

Lan-Hui Feng, Zhi-Hui Lv, Yi-Jie Kong, Xin-Ming Hu\*

Environment Research Institute, Shandong University, Qingdao 266237 (China)

\*E-mail: [huxm@sdu.edu.cn](mailto:huxm@sdu.edu.cn)

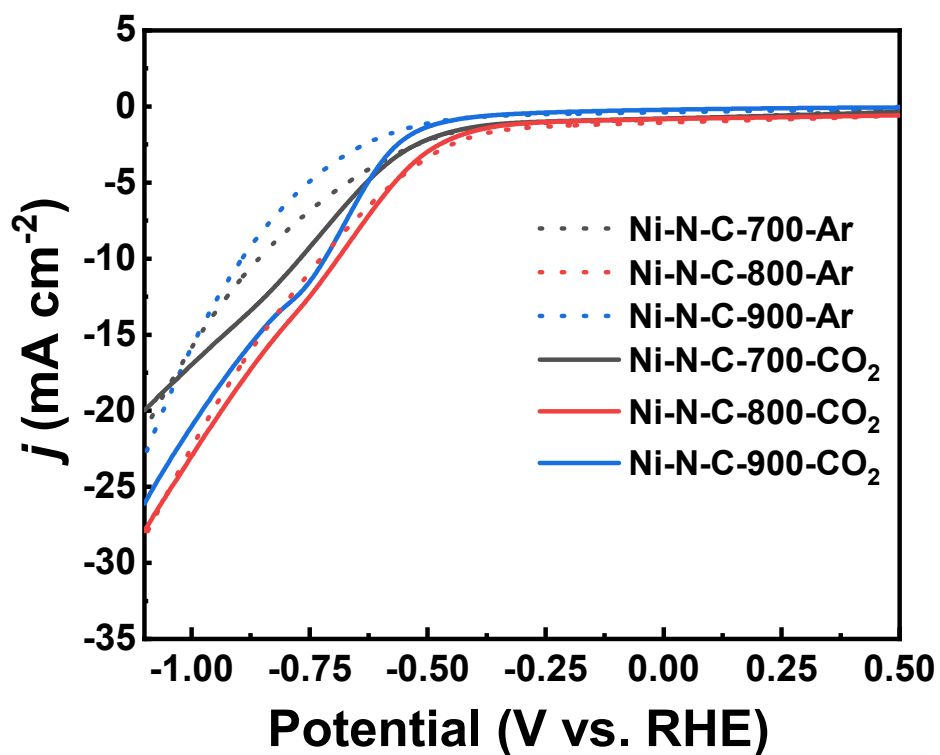

**Fig. S1** Linear sweep voltammograms of Ni-N-C- $T$  ( $T = 700, 800,$  and  $900$  °C) recorded at a sweep rate  $\nu = 10$  mV s<sup>-1</sup> in Ar- or CO<sub>2</sub>-saturated 0.5 M KHCO<sub>3</sub> solution.

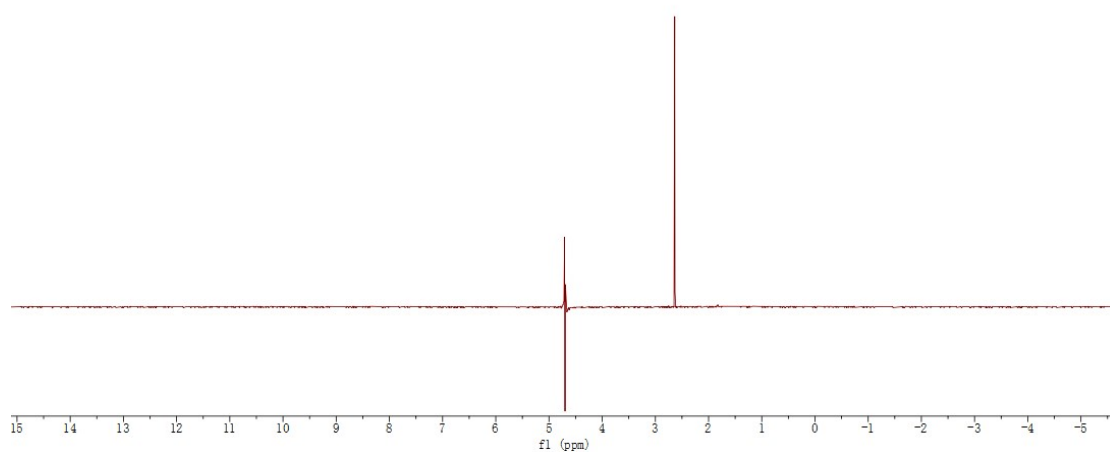

**Fig. S2** <sup>1</sup>H NMR spectrum of the cathodic electrolyte after 20 min electrolysis of CO<sub>2</sub> at -0.87 V vs RHE in 0.5 M KHCO<sub>3</sub> using Ni-N-C-800. The two peaks observed are attributed to the H coming from water and DMSO that is added as the internal reference.

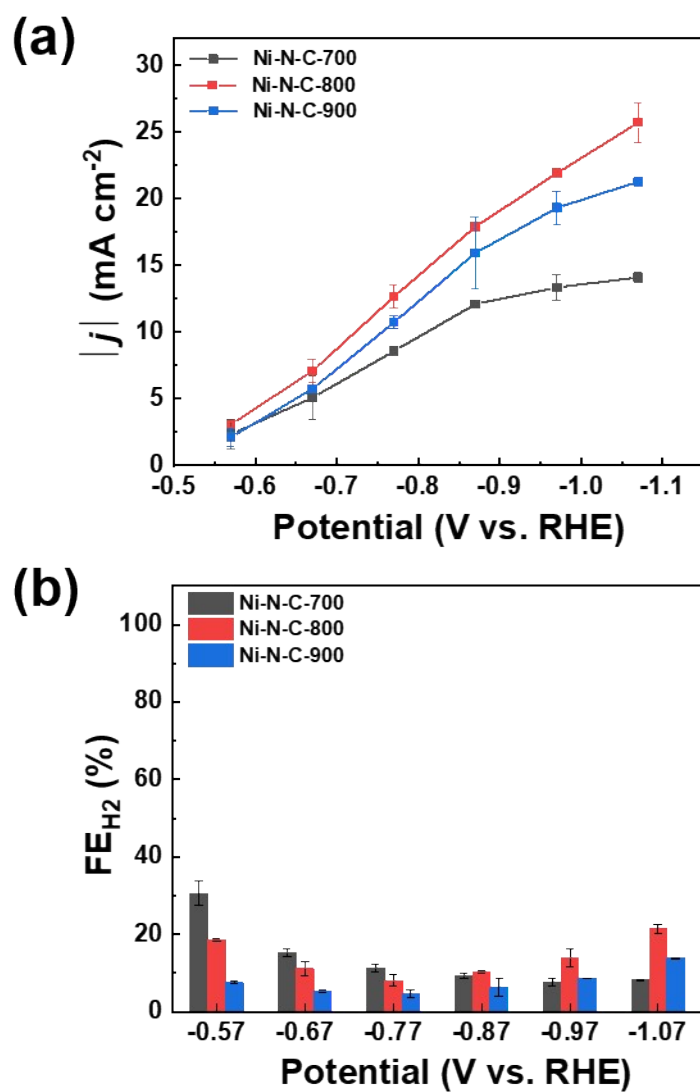

**Fig. S3** (a)  $|j|$  and (b)  $FE_{H_2}$  measured after 20 min electrolysis at various potentials for Ni-N-C- $T$  ( $T = 700, 800,$  and  $900$  °C).

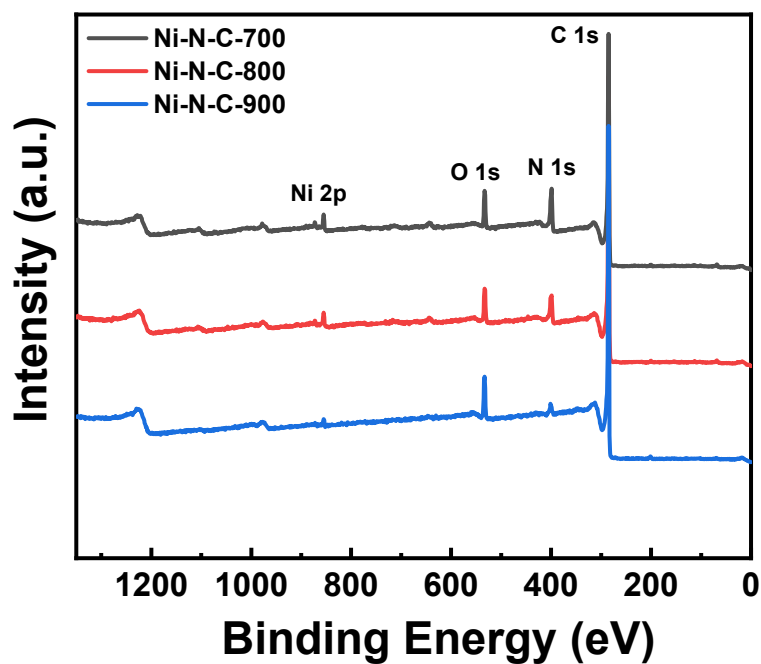

Fig. S4 XPS survey spectra of Ni-N-C-T ( $T = 700, 800,$  and  $900\text{ }^{\circ}\text{C}$ ).

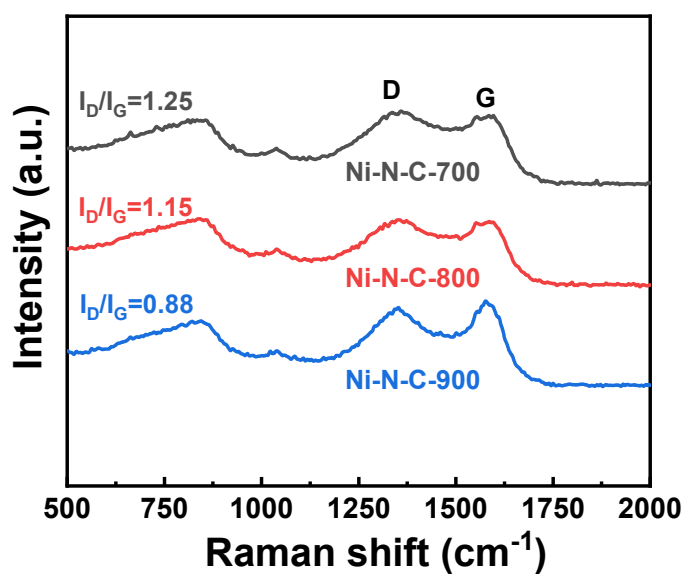

Fig. S5 Raman spectra of Ni-N-C-T ( $T = 700, 800,$  and  $900\text{ }^{\circ}\text{C}$ ).

The small peak around  $1050\text{ cm}^{-1}$  comes from the glass slide, while the broad peak around  $850\text{ cm}^{-1}$  may come from the equipment itself.

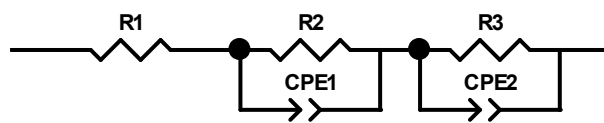

Fig. S6 Equivalent circuit model ( $R_1$ : solution resistance,  $R_2$ : ohmic resistance,  $R_3$ : charge transfer resistance).

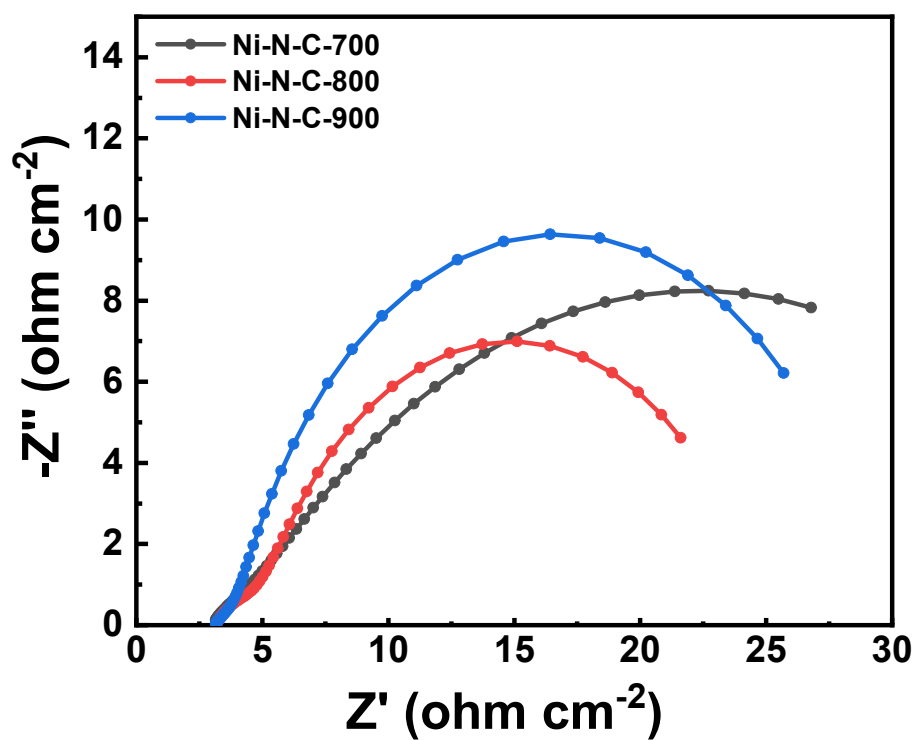

Fig. S7 Nyquist plots of Ni-N-C- $T$  ( $T = 700, 800, \text{ and } 900 \text{ }^\circ\text{C}$ ).

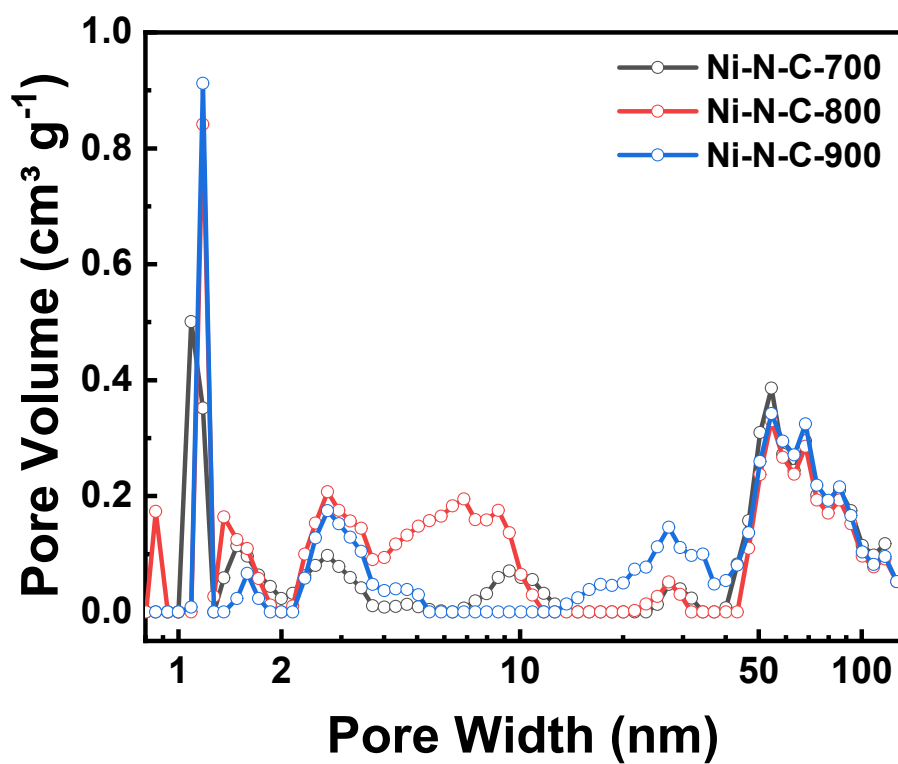

**Fig. S8** (a) N<sub>2</sub> adsorption-desorption isotherms and (b) pore size distributions of Ni-N-C-T ( $T = 700, 800, \text{ and } 900 \text{ }^\circ\text{C}$ ).

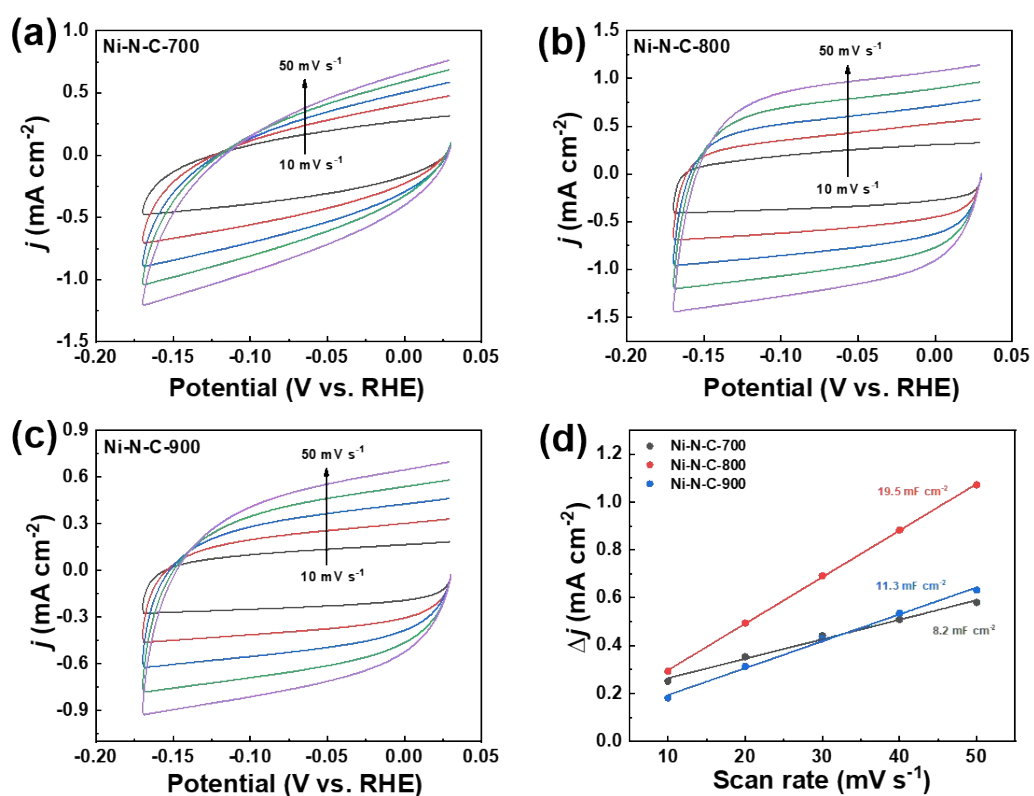

**Fig. S9** (a–c) Cyclic voltammograms recorded at Ni-N-C- $T$  ( $T = 700, 800,$  and  $900$  °C) between  $0.03$  and  $-0.17$  V vs RHE using  $\nu = 10, 20, 30, 40$  and  $50$  mV s<sup>-1</sup> in CO<sub>2</sub>-saturated  $0.5$  M KHCO<sub>3</sub>; (d) the plot of double layer current density,  $\Delta j$ , obtained at  $-0.07$  V vs RHE from voltammograms (a–c) against the scan rate.



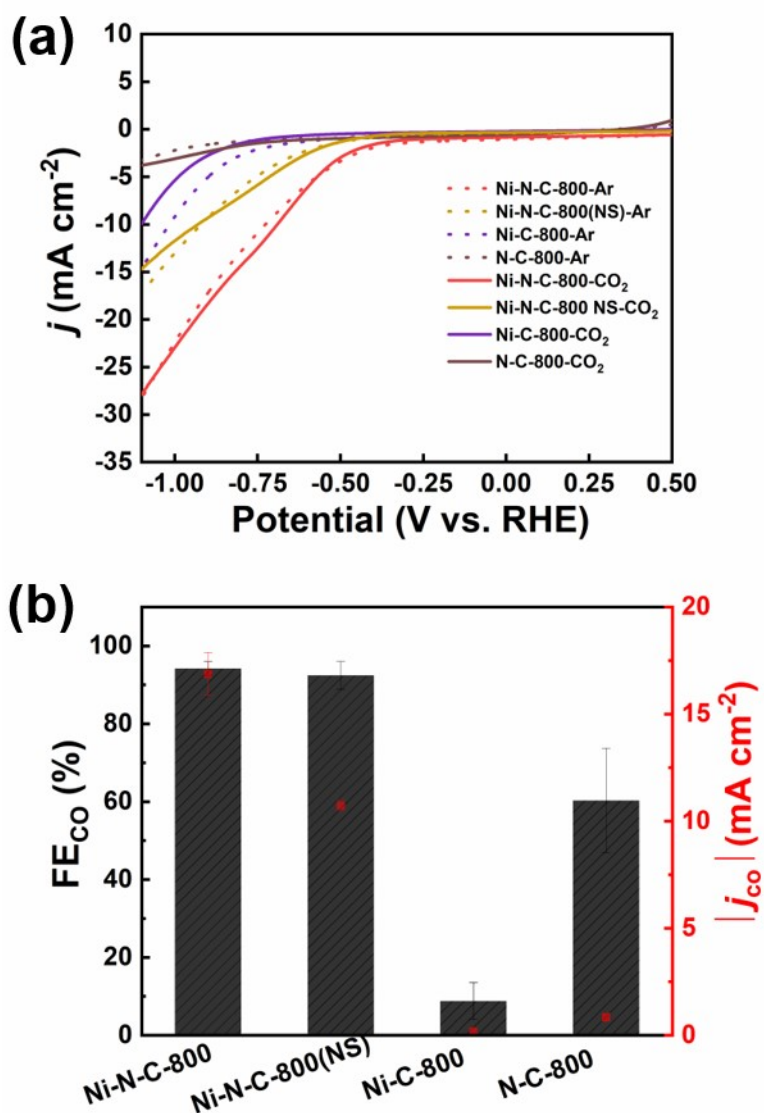

**Fig. S10** (a) Linear sweep voltammograms of Ni-N-C-800, Ni-N-C-800(NS), Ni-C-800, and N-C-800 recorded at a sweep rate  $\nu = 10 \text{ mV s}^{-1}$  in Ar- or CO<sub>2</sub>-saturated 0.5 M KHCO<sub>3</sub> solution, (b) FE<sub>CO</sub> and  $|j_{CO}|$  measured after 20 min electrolysis at  $-0.87 \text{ V vs RHE}$  for Ni-N-C-800, Ni-N-C-800(NS), Ni-C-800, and N-C-800.

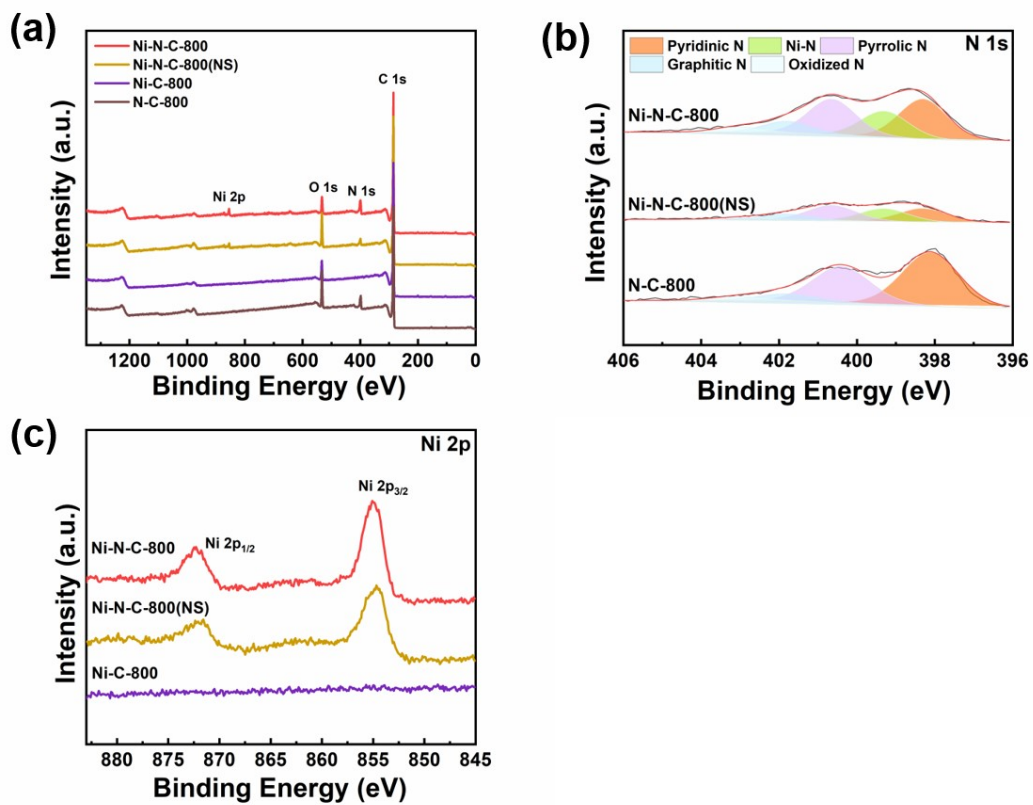

Fig. S11 XPS (a) survey, (b) N 1s, and (c) Ni 2p spectra of the materials.

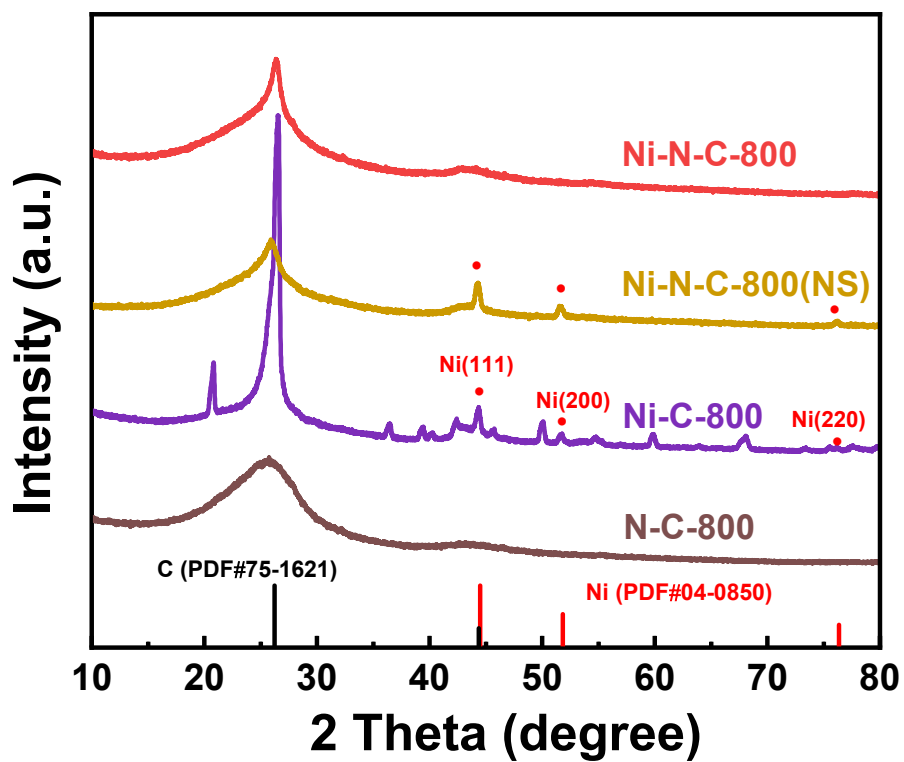

Fig. S12 XRD of Ni-N-C-800, Ni-N-C-800(NS), Ni-C-800, and N-C-800.

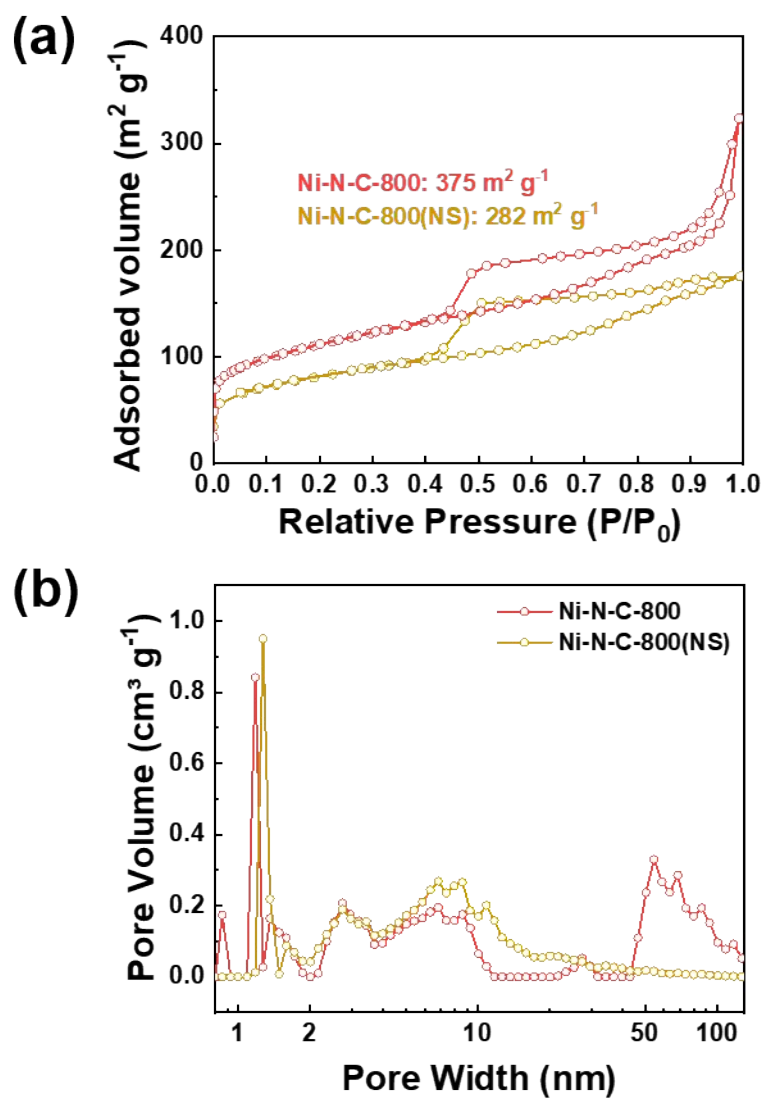

Fig. S13 (a)  $\text{N}_2$  adsorption-desorption isotherms and (b) pore size distributions of Ni-N-C-800 and Ni-N-C-800(NS).

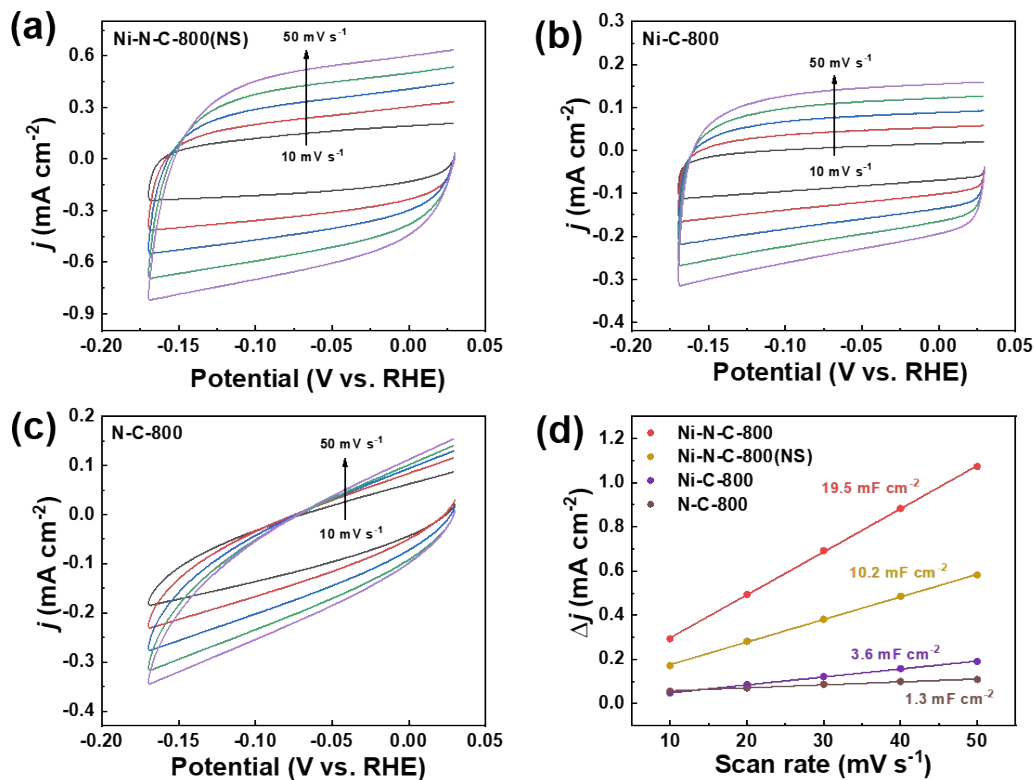

**Fig. S14** (a–c) Cyclic voltammograms recorded at Ni-N-C-800(NS), Ni-C-800, and N-C-800 between 0.03 and  $-0.17$  V vs RHE using  $\nu = 10, 20, 30, 40,$  and  $50$  mV s<sup>-1</sup> in CO<sub>2</sub>-saturated 0.5 M KHCO<sub>3</sub>; (d) the plot of double layer current density,  $\Delta j$ , obtained at  $-0.07$  V vs RHE from voltammograms (a–c) against the scan rate.

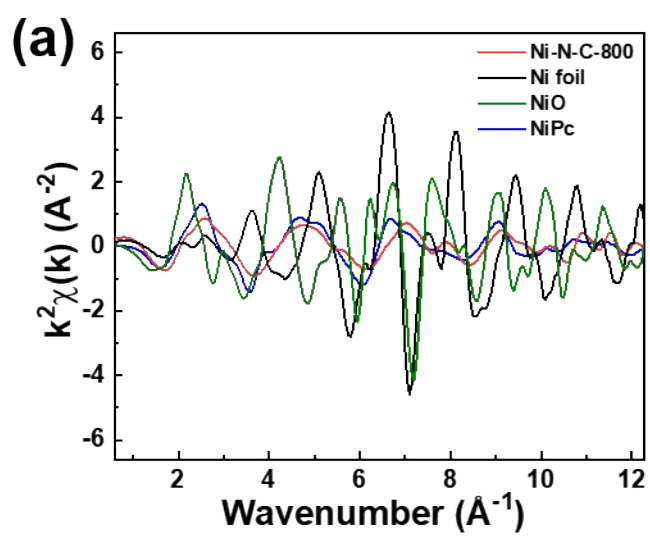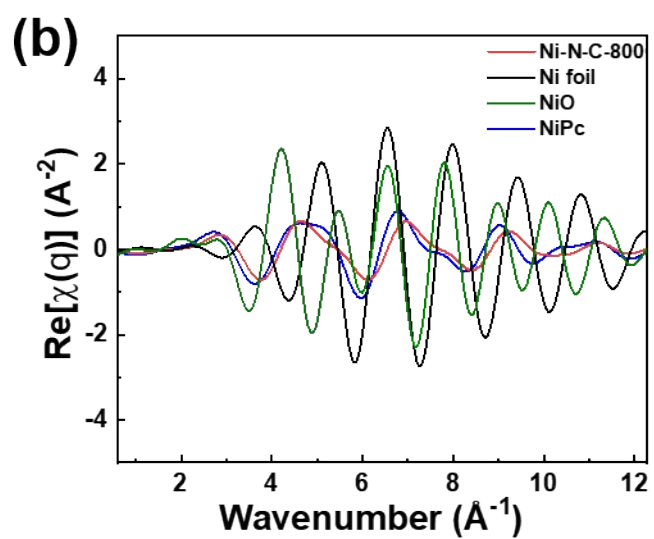

**Fig. S15** (a)  $k^2$ -weighted  $k$ -space and (b)  $q$ -space spectra of Ni-N-C-800, Ni foil, NiO, and NiPc.

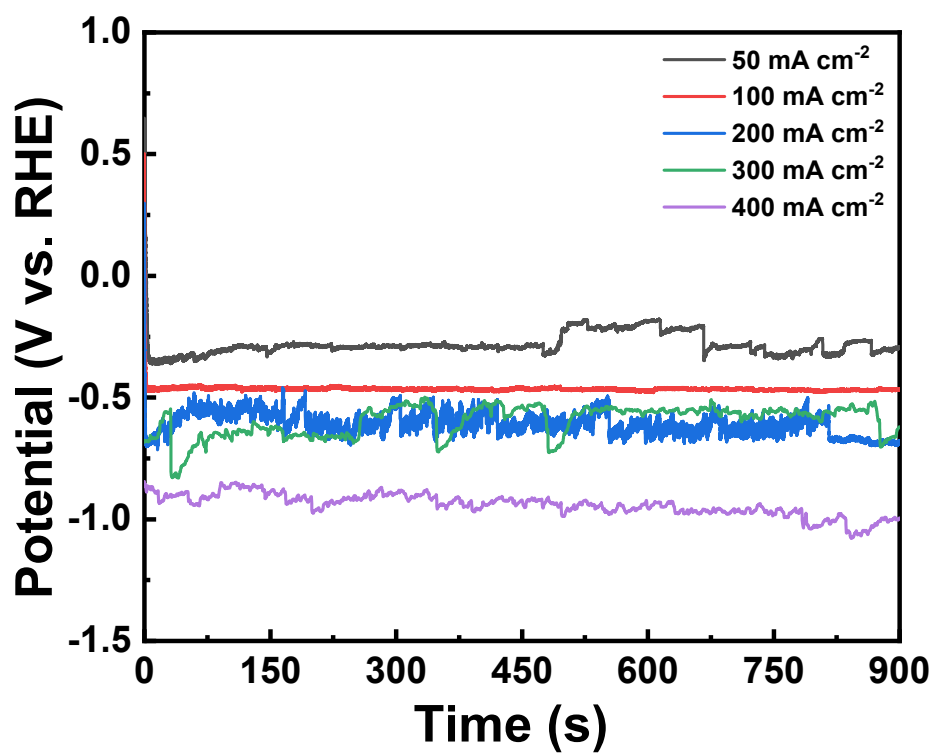

Fig. S16 Working potential of Ni-N-C-800 recorded for 900 s electrolysis at different current density.

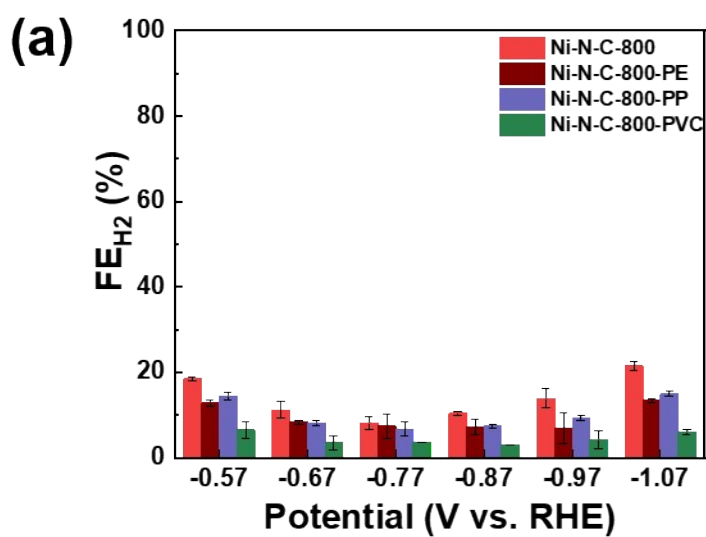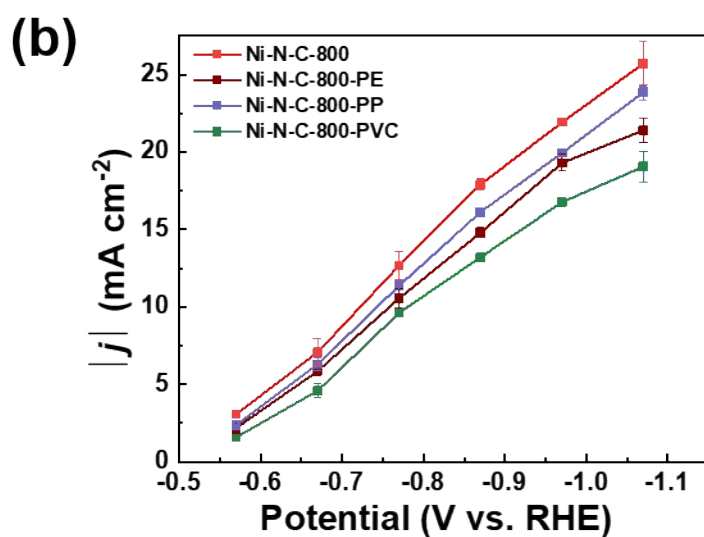

**Fig. S17** (a)  $FE_{H_2}$  and (b)  $|j|$  measured after 20 min electrolysis at varying potentials on Ni-N-C-800, Ni-N-C-800-PE, Ni-N-C-800-PP, and Ni-N-C-800-PVC.



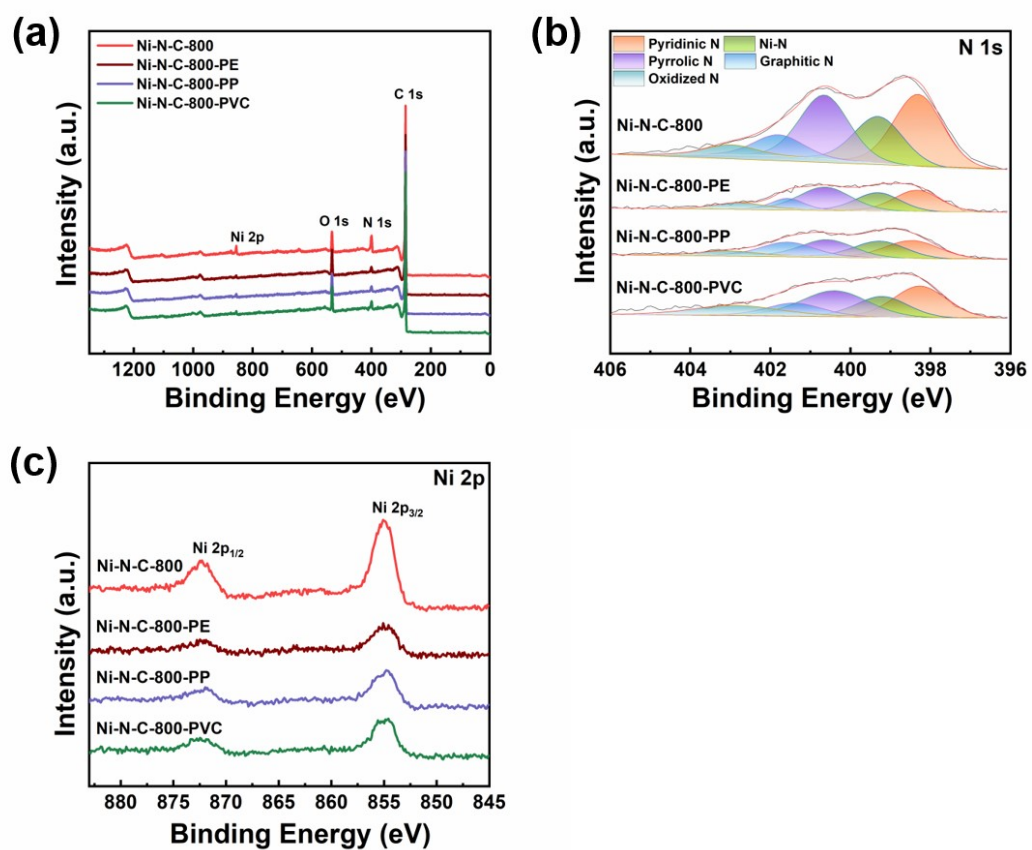

**Fig. S18** (a) XPS survey spectra, (b) N 1s spectra and (c) Ni 2p spectra of Ni-N-C-800, Ni-N-C-800-PE, Ni-N-C-800-PP, and Ni-N-C-800-PVC.

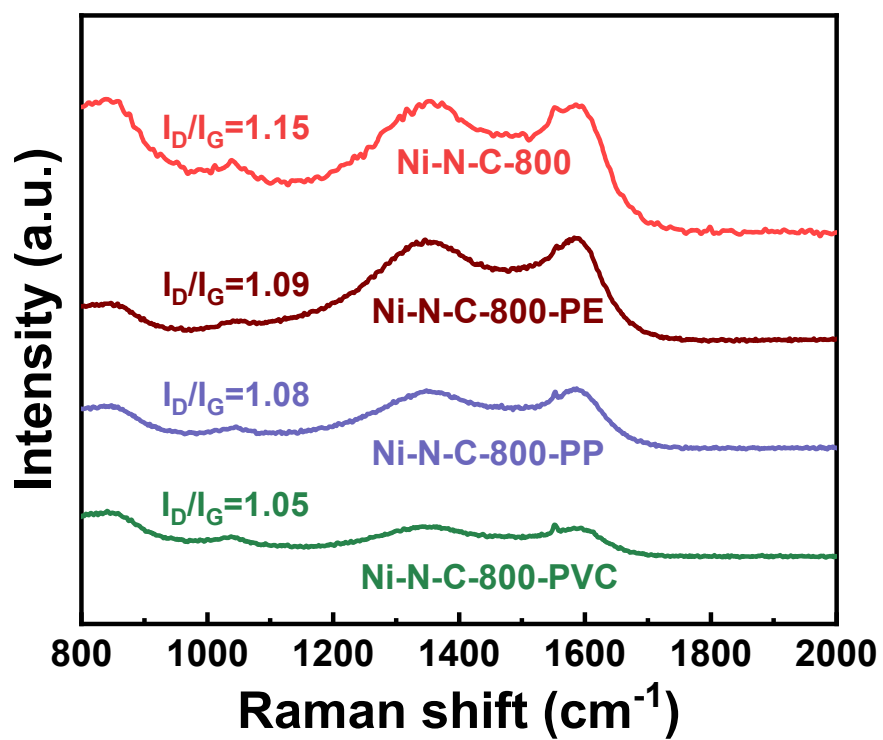

**Fig. S19** Raman spectra of Ni-N-C-800, Ni-N-C-800-PE, Ni-N-C-800-PP, and Ni-N-C-800-PVC.

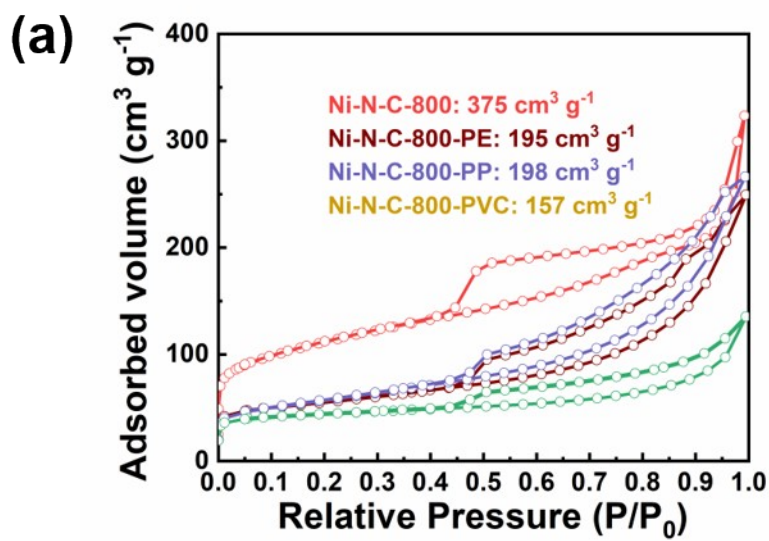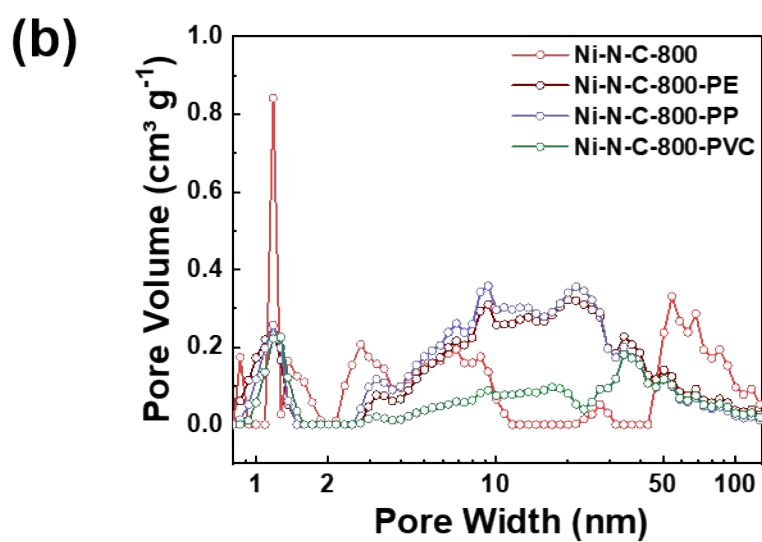

**Fig. S20** (a)  $\text{N}_2$  adsorption-desorption isotherms and (b) pore size distribution of Ni-N-C-800, Ni-N-C-800-PE, Ni-N-C-800-PP, and Ni-N-C-800-PVC.

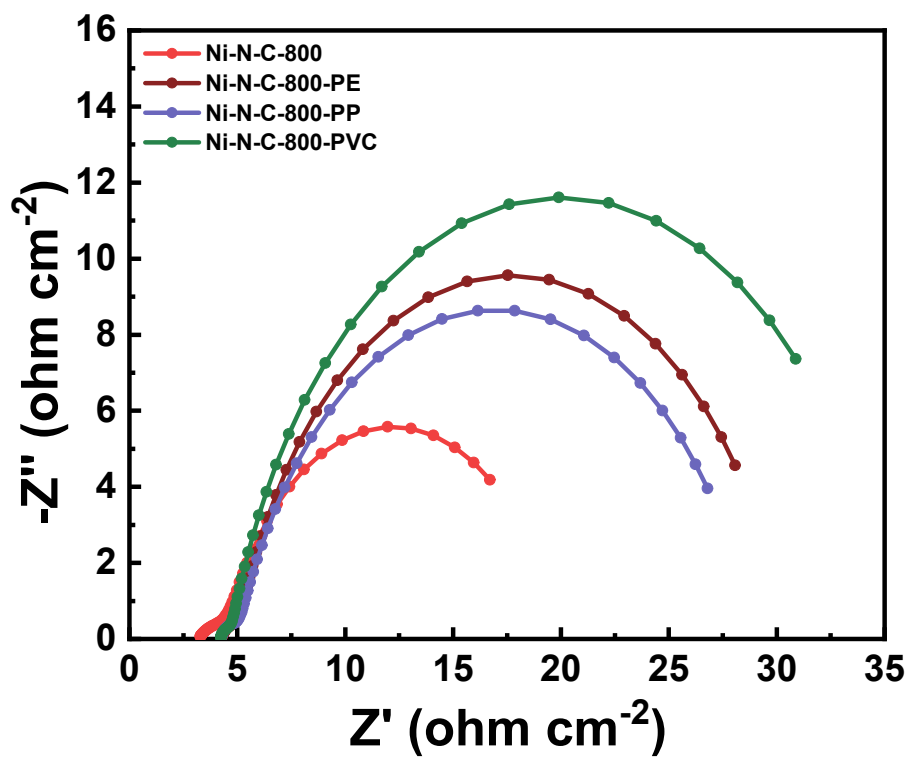

**Fig. S21** Nyquist plots of Ni-N-C-800, Ni-N-C-800-PE, Ni-N-C-800-PP, and Ni-N-C-800-PVC.

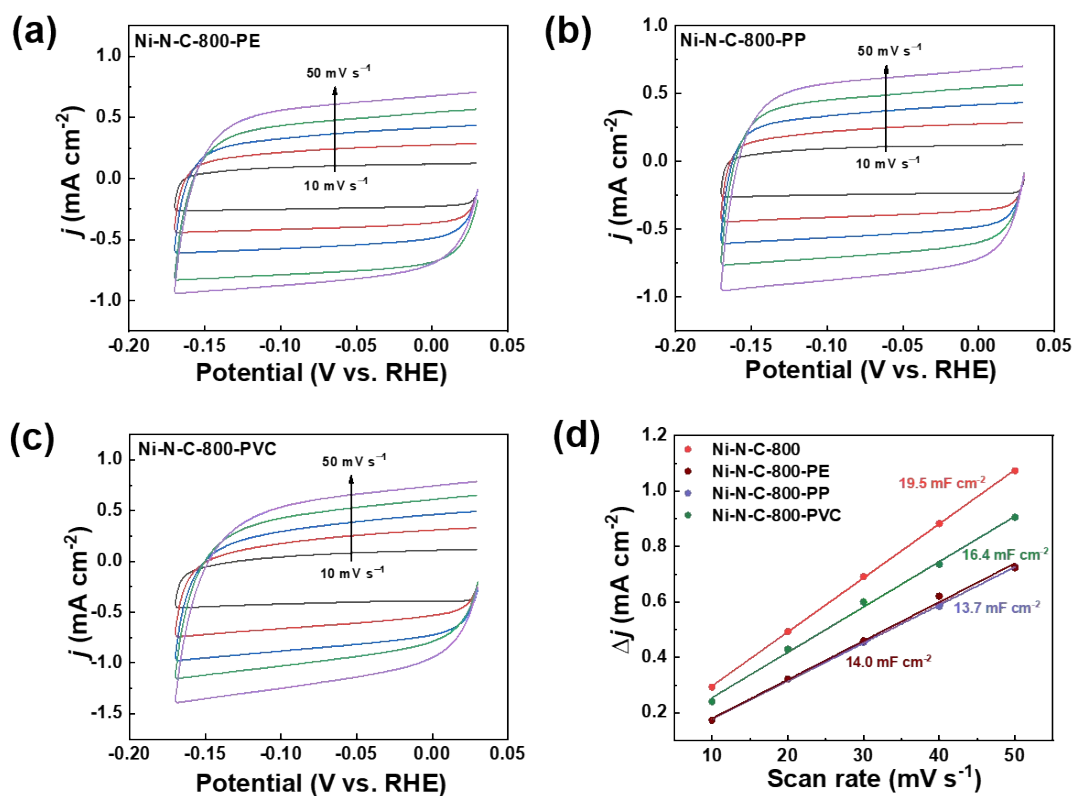

**Fig. S22** (a–c) Cyclic voltammograms recorded at Ni-N-C-800-PE, Ni-N-C-800-PP, and Ni-N-C-800-PVC between 0.03 and  $-0.17$  V vs RHE using  $\nu = 10, 20, 30, 40$  and  $50$  mV s<sup>-1</sup> in CO<sub>2</sub>-saturated  $0.5$  M KHCO<sub>3</sub>; (d) the plot of double layer current density,  $\Delta j$ , obtained at  $-0.07$  V vs RHE from voltammograms (a–c) against the scan rate.

**Table S1** The content of C, N, O, and Ni in the Ni-N-C materials determined by XPS and ICP-OES.

| Material       | C wt%<br>by XPS | N wt%<br>by XPS | O wt%<br>by XPS | Ni wt%<br>by XPS | Ni wt% by ICP-<br>OES |
|----------------|-----------------|-----------------|-----------------|------------------|-----------------------|
| Ni-N-C-700     | 72.91           | 13.27           | 8.27            | 5.53             | 3.21                  |
| Ni-N-C-800     | 78.23           | 9.16            | 8.02            | 4.59             | 2.54                  |
| Ni-N-C-900     | 85.80           | 3.26            | 8.75            | 2.19             | 1.32                  |
| Ni-N-C-800(NS) | 79.40           | 3.60            | 13.49           | 3.49             | 3.81                  |
| Ni-C-800       | 89.77           | 0.30            | 9.94            | -                | 0.67                  |
| N-C-800        | 76.29           | 8.89            | 14.81           | -                | -                     |
| Ni-N-C-800-PE  | 83.55           | 3.36            | 10.38           | 2.71             | 1.65                  |
| Ni-N-C-800-PP  | 84.60           | 3.54            | 8.67            | 3.19             | 1.90                  |
| Ni-N-C-800-PVC | 81.24           | 5.62            | 9.93            | 3.22             | 1.05                  |

**Table S2** Impedance information obtained through equivalent circuit fitting.

| Material       | $R_1$<br>(ohm cm <sup>-2</sup> ) | $R_2$<br>(ohm cm <sup>-2</sup> ) | $R_3$<br>(ohm cm <sup>-2</sup> ) |
|----------------|----------------------------------|----------------------------------|----------------------------------|
| Ni-N-C-700     | 3.02                             | 1.29                             | 36.10                            |
| Ni-N-C-800     | 3.16                             | 1.99                             | 19.75                            |
| Ni-N-C-900     | 3.12                             | 1.02                             | 25.35                            |
| Ni-N-C-800(NS) | 2.80                             | 11.87                            | 62.35                            |
| Ni-C-800       | 3.04                             | 22.50                            | 197.00                           |
| N-C-800        | 3.00                             | 34.13                            | 187.90                           |
| Ni-N-C-800-PE  | 4.27                             | 0.78                             | 25.37                            |
| Ni-N-C-800-PP  | 4.25                             | 0.81                             | 23.88                            |
| Ni-N-C-800-PVC | 4.23                             | 0.46                             | 30.70                            |

$R_1$ : solution resistance,  $R_2$ : ohmic resistance,  $R_3$ : charge transfer resistance.

**Table S3** BET specific surface areas and pore volumes of materials.

| Material       | BET surface area<br>( $\text{m}^2 \text{g}^{-1}$ ) | pore volume<br>( $\text{cm}^3 \text{g}^{-1}$ ) |
|----------------|----------------------------------------------------|------------------------------------------------|
| Ni-N-C-700     | 250                                                | 0.206                                          |
| Ni-N-C-800     | 375                                                | 0.343                                          |
| Ni-N-C-900     | 277                                                | 0.281                                          |
| Ni-N-C-800(NS) | 282                                                | 0.272                                          |
| Ni-N-C-800-PE  | 195                                                | 0.386                                          |
| Ni-N-C-800-PP  | 198                                                | 0.412                                          |
| Ni-N-C-800-PVC | 157                                                | 0.209                                          |

**Table S4** EXAFS fitting parameters at the Ni *K*-edge for Ni-N-C-800.

| Sample     | Shell | CN <sup>a</sup> | $R(\text{\AA})^b$ | $\sigma^2 (\text{\AA}^2 \cdot 10^{-3})^c$ | $\Delta E_0(\text{eV})^d$ | <i>R</i> factor |
|------------|-------|-----------------|-------------------|-------------------------------------------|---------------------------|-----------------|
| Ni-N-C-800 | Ni-N  | 3.93±0.22       | 1.83±0.04         | 0.001                                     | 10.87±0.95                | 0.0062          |

<sup>a</sup>CN, coordination number; <sup>b</sup>*R*, distance between absorber and backscatter atoms; <sup>c</sup> $\sigma^2$ , Debye-Waller factor to account for both thermal and structural disorders; <sup>d</sup> $\Delta E_0$ , inner potential correction; *R* factor indicates the goodness of the fit. Data range for fitting in *k*-space and *R*-space were 3–11 and 1–2  $\text{\AA}$ , respectively. *R* factor < 0.02.

**Table S5** The performance of Ni-N-C materials for eCO<sub>2</sub>RR in flow cells reported in

recent years.

| Electrocatalyst                             | Carbon source | Electrolyte             | Potential<br>(V vs. RHE) | $ j $ (mA cm <sup>-2</sup> ) | FEco (%)  | Ref.             |
|---------------------------------------------|---------------|-------------------------|--------------------------|------------------------------|-----------|------------------|
| N <sub>3</sub> NiPc-CNT                     | CNT           | 1.0 M KOH               | -1.05                    | 250.0                        | 100       | 1                |
| h-Ni/N/C                                    | ZIF-8         | 1.0 M KOH               | -1.3                     | 462.4                        | 93.8      | 2                |
| Ni-N <sub>4</sub> /C-NH <sub>2</sub>        | ZIF-8         | 1.0 M KOH               | -0.9                     | 410                          | 89.3      | 3                |
| NiSA/PCFM                                   | ZIF-8         | 0.5 M KHCO <sub>3</sub> | -1.0                     | 308.4                        | 88        | 4                |
| NiSA/NP                                     | CNT           | 1.0 M KOH               | -0.5                     | 346                          | 98        | 5                |
| Ni-N-C-900                                  | ZIF-8         | 1.0 M KOH               | -1.18                    | 726                          | 91        | 6                |
| CBNNiGd-700                                 | Carbon black  | 1.0 M KOH               | -0.91                    | 308                          | 97        | 7                |
| Ni(NC)                                      | Ni-MOF        | 1.0 M KOH               | -1.82                    | 160                          | 99        | 8                |
| Ni-NCB                                      | ZIF-8         | 0.5 M KHCO <sub>3</sub> | -                        | 100                          | 100       | 9                |
| InNi DS/NC                                  | ZIF-8         | 1.0 M KOH               | -1.0                     | 317.2                        | 85.2      | 10               |
| Ni-N-C-3                                    | GQDs          | 1.0 M KHCO <sub>3</sub> | -                        | 122                          | 95        | 11               |
| Ni@N-C                                      | CNT           | 1.0 M KOH               | -1.07                    | 160                          | ~70       | 12               |
| Ni-PCNF-0.5PMMA                             | Ni-ZIF-8      | 1.0 M KHCO <sub>3</sub> | -1.8                     | 170                          | 94.3      | 13               |
| (NH <sub>x</sub> ) <sub>16</sub> -NiPc/CNTs | CNT           | 1.0 M KOH               | -1.37                    | 305                          | 100       | 14               |
| Ni-ASCs/4.3 wt.%                            | Ketjen Black  | 1.0 M KOH               | -1.27                    | 507.2                        | 95.1      | 15               |
| <b>Ni-N-C-800</b>                           | <b>PET</b>    | <b>1.0 M KOH</b>        | <b>-0.6</b>              | <b>300</b>                   | <b>99</b> | <b>This work</b> |
| <b>Ni-N-C-800</b>                           | <b>PET</b>    | <b>1.0 M KOH</b>        | <b>-1.0</b>              | <b>400</b>                   | <b>91</b> | <b>This work</b> |



## References

- 1 D. D. Ma, S. G. Han, C. S. Cao, W. B. Wei, X. F. Li, B. Chen, X. T. Wu and Q. L. Zhu, Bifunctional single-molecular heterojunction enables completely selective CO<sub>2</sub>-to-CO conversion integrated with oxidative 3D nano-polymerization, *Energy Environ. Sci.*, 2021, **14**, 1544-1552.
- 2 Y. Q. Chen, J. R. Zhang, J. Y. Tian, Y. Guo, F. F. Xu, Y. Zhang, X. Z. Wang, Y. G. Yang, Q. Wu and Z. Hu, Hierarchical Ni/N/C single-site catalyst achieving industrial-level current density and ultra-wide potential plateau of high CO Faradic efficiency for CO<sub>2</sub> electroreduction, *Adv. Funct. Mater.*, 2023, **33**, 2214658.
- 3 Z. P. Chen, X. X. Zhang, W. Liu, M. Y. Jiao, K. W. Mou, X. P. Zhang and L. C. Liu, Amination strategy to boost the CO<sub>2</sub> electroreduction current density of M-N/C single-atom catalysts to the industrial application level, *Energy Environ. Sci.*, 2021, **14**, 2349-2356.
- 4 H. P. Yang, Q. Lin, C. Zhang, X. Y. Yu, Z. Cheng, G. D. Li, Q. Hu, X. Z. Ren, Q. L. Zhang, J. H. Liu and C. X. He, Carbon dioxide electroreduction on single-atom nickel decorated carbon membranes with industry compatible current densities, *Nat. Commun.*, 2020, **11**, 593.
- 5 W. H. Ren, X. Tan, C. Jia, A. Krammer, Q. Sun, J. T. Qu, S. C. Smith, A. Schueler, X. L. Hu and C. Zhao, Electronic regulation of nickel single atoms by confined nickel nanoparticles for energy-efficient CO<sub>2</sub> electroreduction, *Angew. Chem. Int. Ed.*, 2022, **61**, e202203335.
- 6 Y. Li, N. M. Adli, W. T. Shan, M. Y. Wang, M. J. Zachman, S. Hwang, H. Tabassum, S. Karakalos, Z. X. Feng, G. F. Wang, Y. G. C. Li and G. Wu, Atomically dispersed single Ni site catalysts for high-efficiency CO<sub>2</sub> electroreduction at industrial-level current densities, *Energy Environ. Sci.*, 2022, **15**, 2108-2119.
- 7 Q. W. Liu, P. Y. Bai, S. L. Wei, C. C. Yang and L. Xu, Gadolinium changes the local electron densities of nickel 3d orbitals for efficient electrocatalytic CO<sub>2</sub> reduction, *Angew. Chem. Int. Ed.*, 2022, **61**, e202201166.
- 8 C. F. Wen, F. X. Mao, Y. W. Liu, X. Y. Zhang, H. Q. Fu, L. R. Zheng, P. F. Liu and H. G.

- Yang, Nitrogen-stabilized low-valent Ni motifs for efficient CO<sub>2</sub> electrocatalysis, *ACS Catal.*, 2019, **10**, 1086-1093.
- 9 C. M. Zhao, Y. Wang, Z. J. Li, W. X. Chen, Q. Xu, D. S. He, D. S. Xi, Q. H. Zhang, T. W. Yuan, Y. T. Qu, J. Yang, F. Y. Zhou, Z. K. Yang, X. Q. Wang, J. Wang, J. Luo, Y. F. Li, H. H. Duan, Y. Wu and Y. D. Li, Solid-diffusion synthesis of single-atom catalysts directly from bulk metal for efficient CO<sub>2</sub> reduction, *Joule*, 2019, **3**, 584-594.
- 10 Z. Z. Fan, R. C. Luo, Y. X. Zhang, B. Zhang, P. L. Zhai, Y. T. Zhang, C. Wang, J. F. Gao, W. Zhou, L. C. Sun and J. G. Hou, Oxygen-bridged indium-nickel atomic pair as dual-metal active sites enabling synergistic electrocatalytic CO<sub>2</sub> reduction, *Angew. Chem. Int. Ed.*, 2023, **62**, e202216326.
- 11 C. Xia, Y. R. Qiu, Y. Xia, P. Zhu, G. H. King, X. Zhang, Z. Y. Wu, J. Y. Kim, D. A. Cullen, D. X. Zheng, P. Li, M. Shakouri, E. Heredia, P. X. Cui, H. N. Alshareef, Y. F. Hu and H. T. Wang, General synthesis of single-atom catalysts with high metal loading using graphene quantum dots, *Nat. Chem.*, 2021, **13**, 887-894.
- 12 J. Meng, Z. C. Miao, J. Zhang, Z. Wang, R. C. Zhang, L. L. Xu, L. C. Diao, J. Zhou and S. P. Zhuo, One-step synthesis of N-doped carbon nanotubes-encapsulated Ni nanoparticles for efficient electrochemical CO<sub>2</sub> reduction to CO, *J. Alloys Compd.*, 2023, **939**, 168798.
- 13 H. Wang, H. Y. Chuai, X. Y. Chen, J. L. Lin, S. Zhang and X. B. Ma, Self-supported porous carbon nanofibers decorated with single Ni atoms for efficient CO<sub>2</sub> electroreduction, *ACS Appl. Mater. Interfaces*, 2023, **15**, 1376-1383.
- 14 S. G. Han, M. Zhang, Z. H. Fu, L. Zheng, D. D. Ma, X. T. Wu and Q. L. Zhu, Enzyme-inspired microenvironment engineering of a single-molecular heterojunction for promoting concerted electrochemical CO<sub>2</sub> reduction, *Adv. Mater.*, 2022, **34**, 2202830.
- 15 S. G. Wang, Z. Y. Qian, Q. Z. Huang, Y. J. Tan, F. Lv, L. Y. Zeng, C. S. Shang, K. Wang, G. Q. Wang, Y. D. Mao, Y. Wang, Q. H. Zhang, L. Gu and S. J. Guo, Industrial-level CO<sub>2</sub> electroreduction using solid-electrolyte devices enabled by high-loading nickel atomic site catalysts, *Adv. Energy Mater.*, 2022, **12**, 2201278.
